# Supplementary material
Source: MDPI journal article supplement (https://www.mdpi.com/2072-4292/14/5/1063)
Supplement: s1 [file s1]

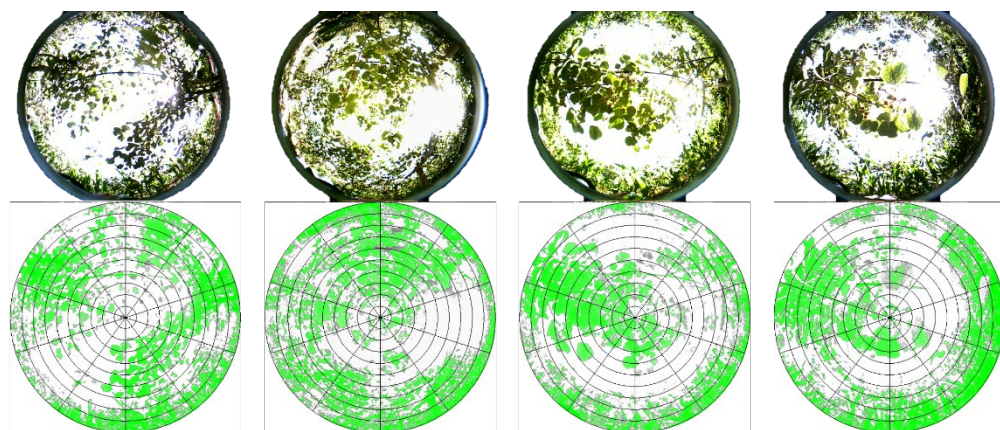

**Figure S1.** Images taken and processed by CI-110.

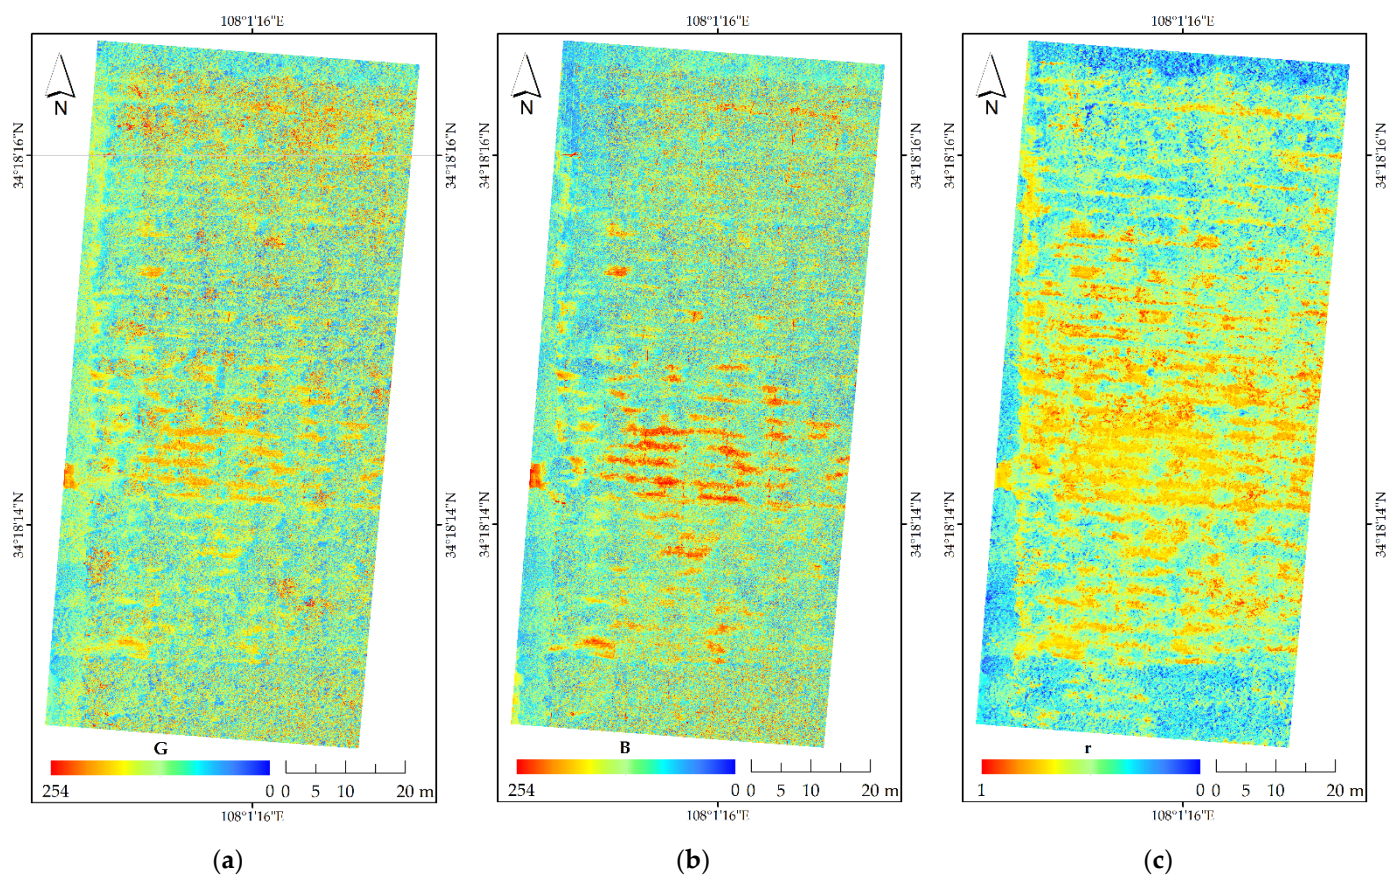



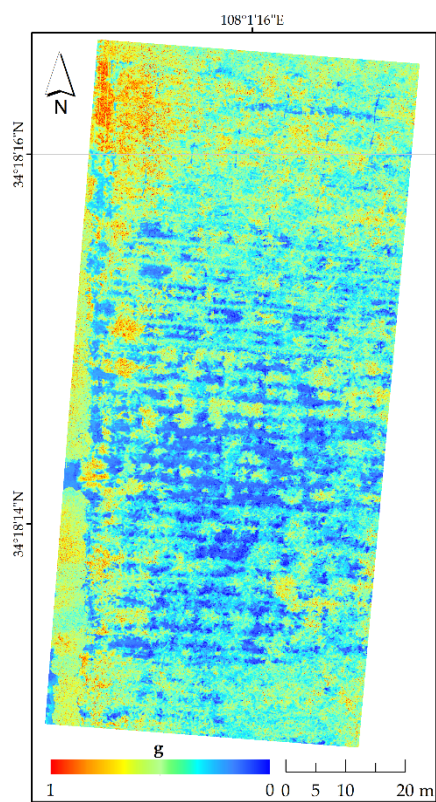

(d)

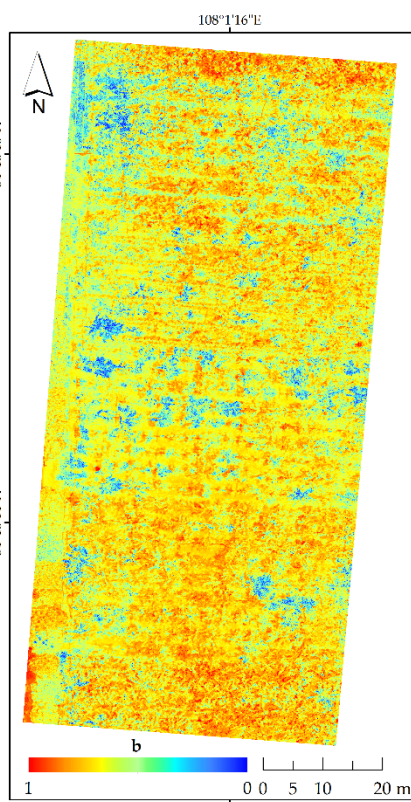

(e)

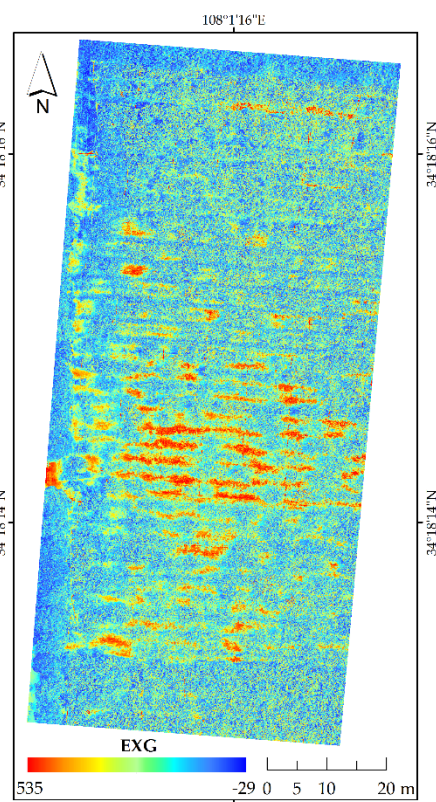

(f)

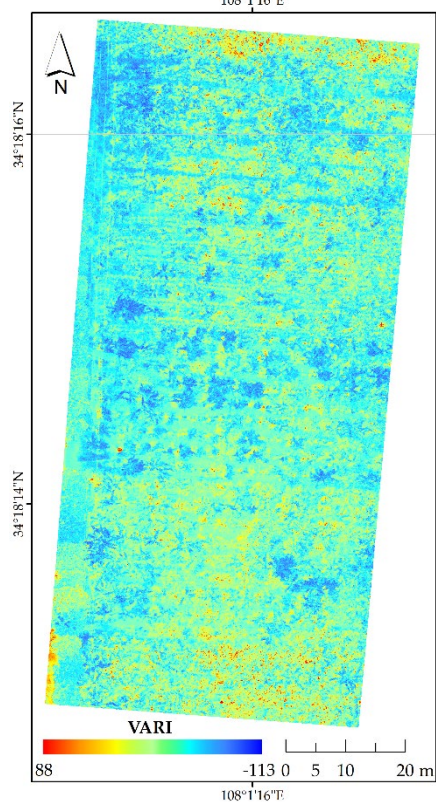

(g)

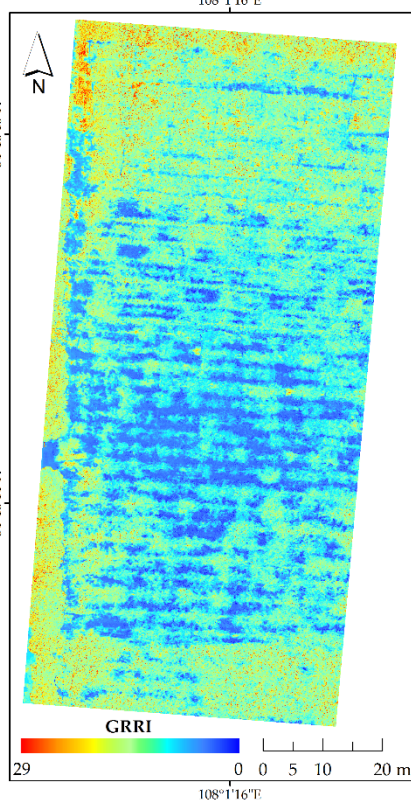

(h)

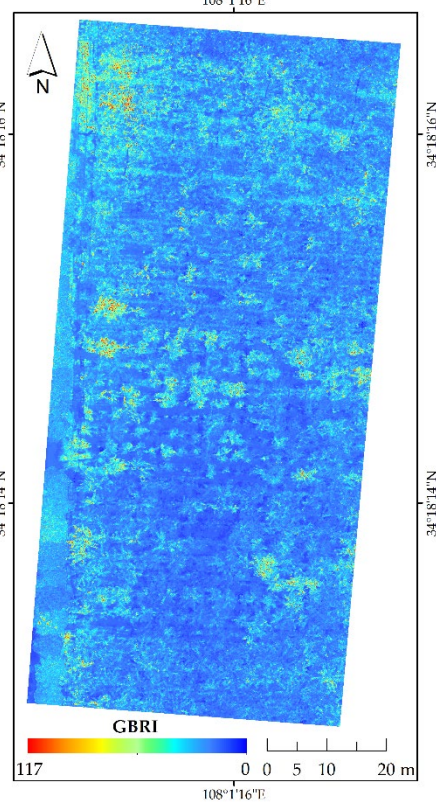

(i)



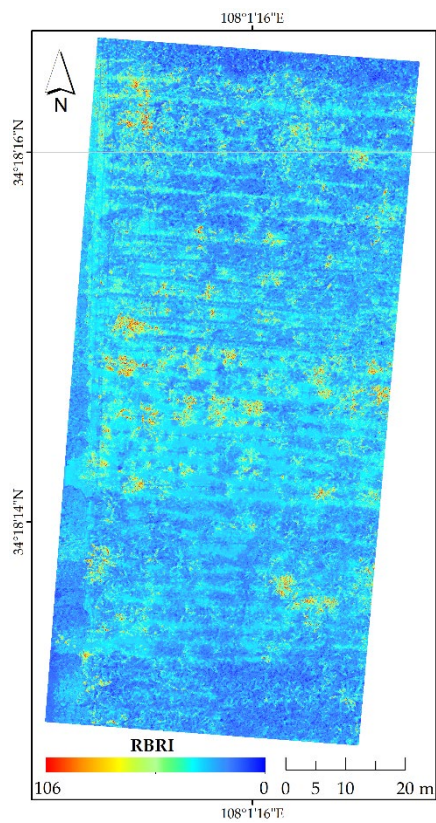

(j)

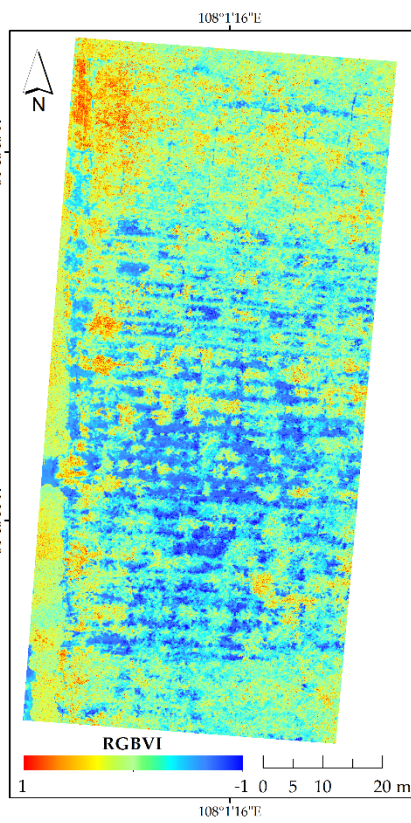

(k)

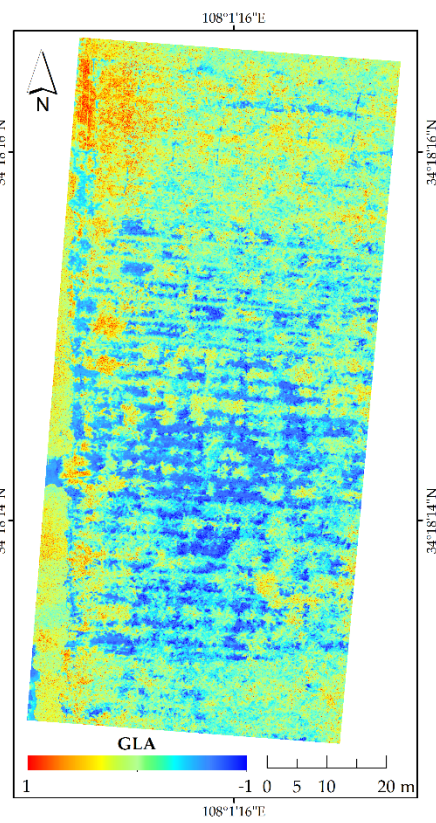

(l)

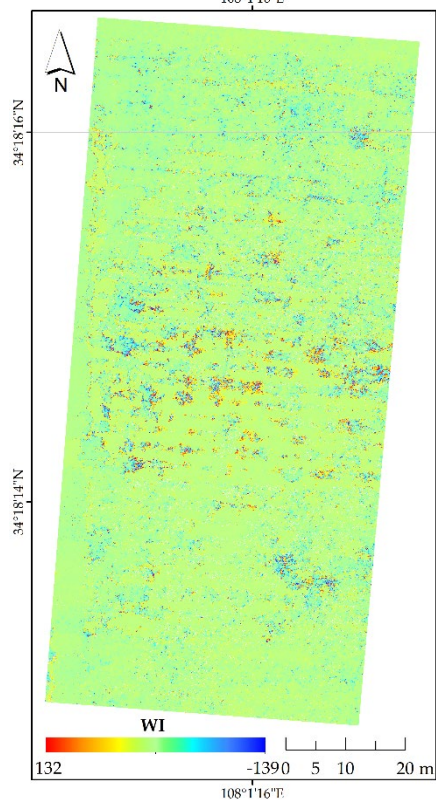

(m)

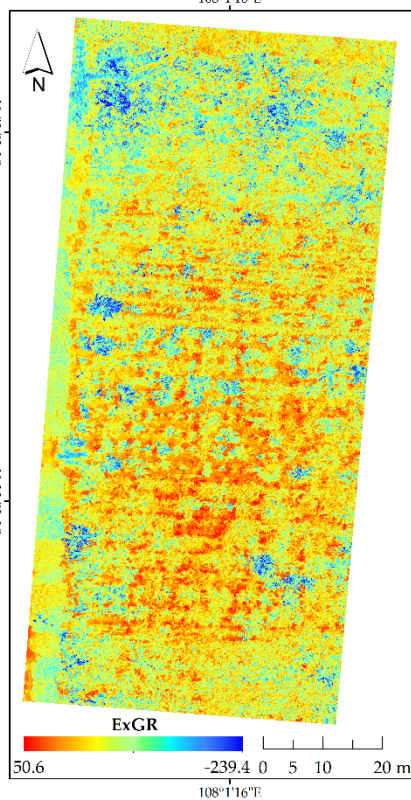

(n)

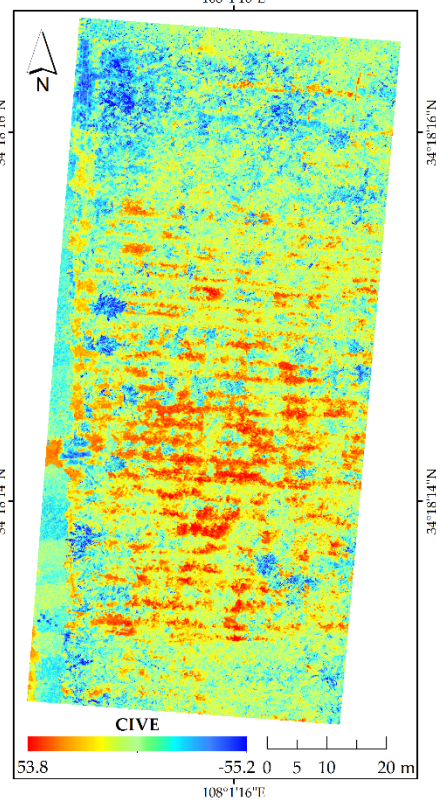

(o)



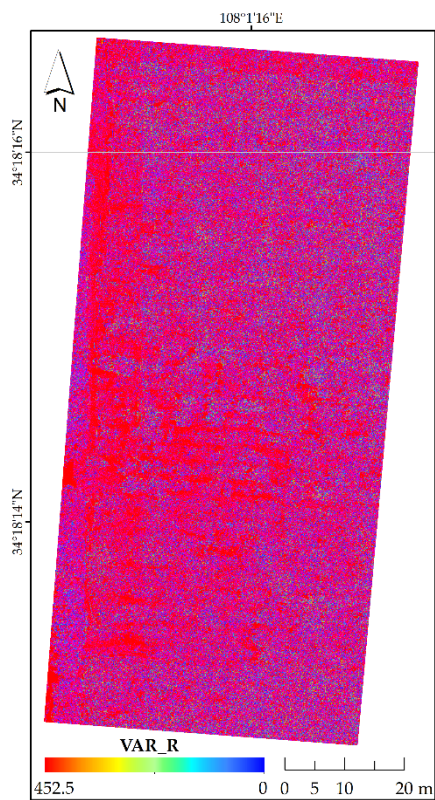

(p)

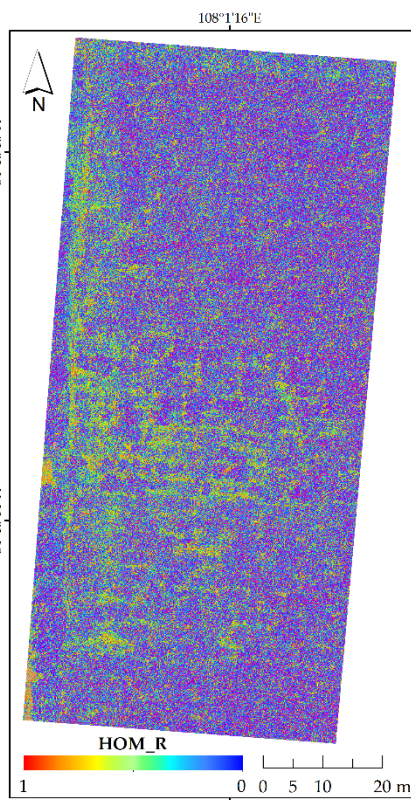

(q)

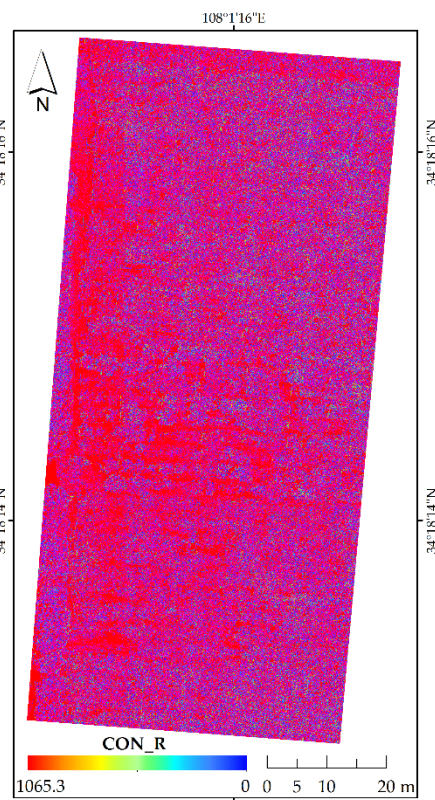

(r)

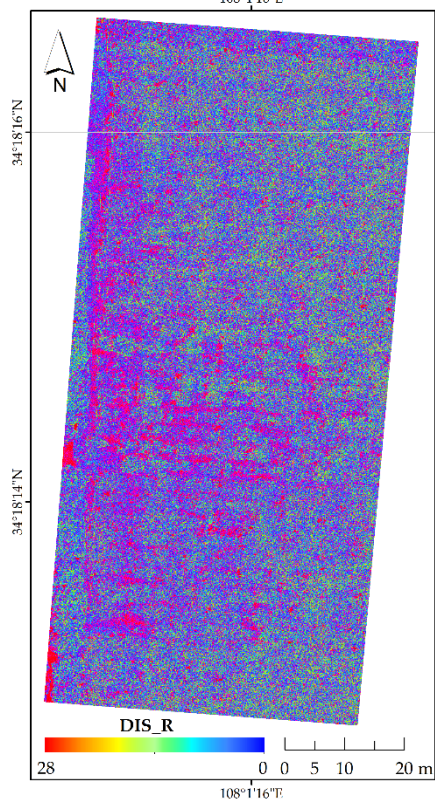

(s)

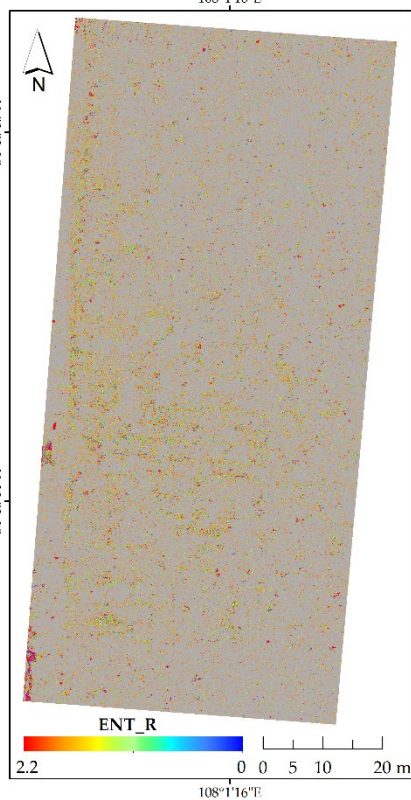

(t)

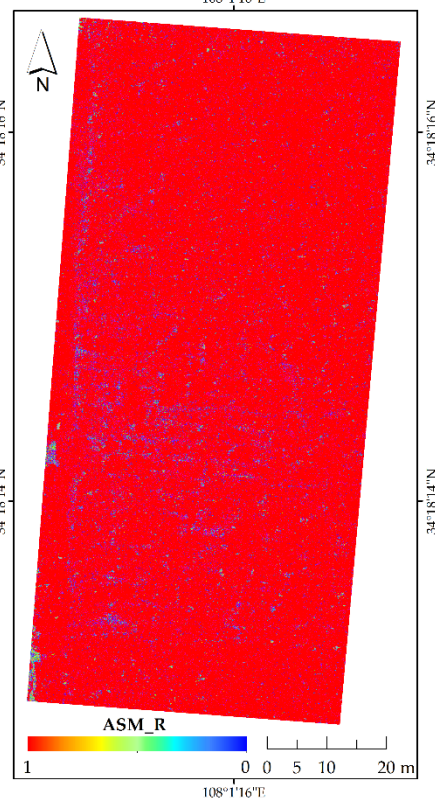

(u)



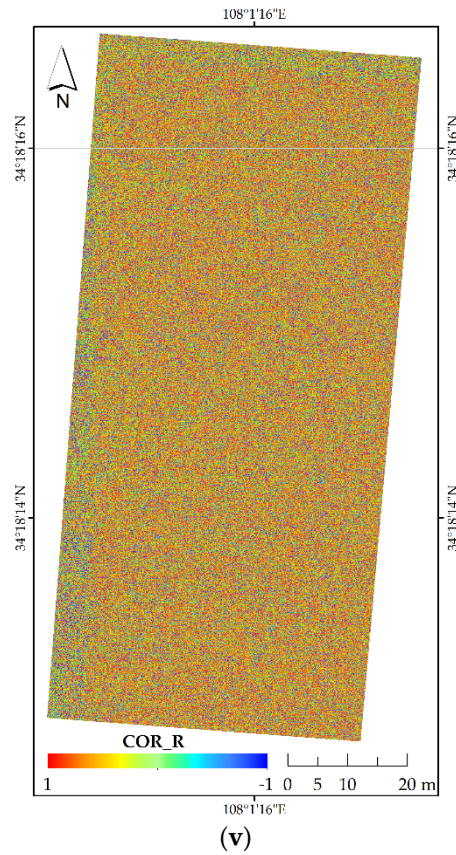

**Figure S2.** More images of parameters in the study. (a) G (DN value of Green Channel); (b) B (DN value of Blue Channel); (c). r (Normalized Redness Intensity); (d) g (Normalized Greenness Intensity); (e) b (Normalized Blueness Intensity); (f). EXG (Excess Green Index) ; (g) VARI (Visible Atmospherically Resistant Index); (h). GRRI (Green Red Ratio Index); (i) GBRI (Green Blue Ratio Index); (j) RBRI (Red Blue Ratio Index); (k). RGBVI (Red Green Blue Vegetation Index) ; (l) GLA (Green Leaf Algorithm); (m) WI (Woebbecke Index); (n) ExGR (Excess Green Red Index); (o). CIVE (Color Index of Vegetation) ; (p) VAR\_R (Variance of the red band); (q) HOM\_R (Homogeneity of the red band); (r). CON\_R (Contrast of the red band); (s) DIS\_R (Dissimilarity of the red band); (t). ENT\_R (Entropy of the red band); (u) ASM\_R (Angular Second Moment of the red band); (v). COR\_R (Correlation of the red band).

**Table S1.** Comparison of single-factor model for kiwifruit LAI in each growth stage.

| Growth Stages | Independent Variable | Modeling Method | Modeling Equation                          | R <sup>2</sup> | RMSE  | nRMSE/% |
|---------------|----------------------|-----------------|--------------------------------------------|----------------|-------|---------|
| IF            | R                    | linear          | $y = -0.0141x + 1.6649$                    | 0.450          | 0.082 | 16.10   |
|               |                      | quadratic       | $y = 0.0005x^2 - 0.1028x + 5.2873$         | 0.466          | 0.081 | 15.86   |
|               |                      | polynomial      |                                            |                |       |         |
|               |                      | power           | $y = 11596.9269x^{-2.2793}$                | 0.462          | 0.081 | 15.93   |
|               |                      | exponential     | $y = 4.8253e^{-0.028x}$                    | 0.459          | 0.082 | 15.96   |
| YF            | ExGR                 | logarithmic     | $y = -1.1559\ln(x) + 5.6033$               | 0.454          | 0.082 | 16.03   |
|               |                      | linear          | $y = 0.0062183x + 1.5306143$               | 0.715          | 0.061 | 14.31   |
|               |                      | quadratic       | $y = -0.00001784x^2 + 0.00006079x + 1.004$ | 0.719          | 0.061 | 14.22   |
|               |                      | polynomial      |                                            |                |       |         |
|               |                      | power           | -                                          |                |       |         |
| FE            | ExGR                 | exponential     | $y = 3.9041e^{0.0126x}$                    | 0.677          | 0.065 | 15.26   |
|               |                      | logarithmic     | -                                          |                |       |         |
|               |                      | linear          | $y = 0.0080156x + 2.0424765$               | 0.702          | 0.115 | 18.96   |
|               |                      | quadratic       | $y = 0.00006931x^2 + 0.03275x + 4.215$     | 0.736          | 0.108 | 17.84   |
|               |                      | polynomial      |                                            |                |       |         |
|               |                      | power           | -                                          |                |       |         |



|             |                         |       |       |       |
|-------------|-------------------------|-------|-------|-------|
| exponential | $y = 6.4786e^{0.0135x}$ | 0.735 | 0.108 | 17.87 |
| logarithmic | -                       |       |       |       |

Notes: - : indicates that the model does not exist.

**Table S2.** Variable selection for SWR with only spectral indexes in each growth stage.

| Growth Stages           | Independent Variable                                                   | AIC     | R <sup>2</sup> | RMSE  | nRMSE/% |
|-------------------------|------------------------------------------------------------------------|---------|----------------|-------|---------|
| Initial flowering stage | R, G, B, b, EXG, GBRI, RBRI, RGBVI, ExGR, CIVE                         | -318.46 | 0.564          | 0.073 | 14.33%  |
|                         | G, b, GBRI                                                             | -323.23 | 0.541          | 0.075 | 14.70%  |
|                         | G, RBRI                                                                | -321.82 | 0.516          | 0.077 | 15.09%  |
| Young fruit stage       | R, G, B, r, g, b, EXG, VARI, GRRI, GBRI, RGBVI, GLA, MGRVI, ExGR, CIVE | -361.12 | 0.815          | 0.049 | 11.55%  |
|                         | R, G, r, g, VARI, GRRI, GBRI, RGBVI, GLA, MGRVI                        | -363.11 | 0.815          | 0.049 | 11.55%  |
|                         | R, G, r, g, VARI, GRRI, GBRI, RGBVI, GLA                               | -365.10 | 0.819          | 0.049 | 11.55%  |
| Fruit enlargement stage | R, G, B, r, g, b, EXG, VARI, GRRI, GBRI, RGBVI, GLA, MGRVI, ExGR, CIVE | -273.16 | 0.781          | 0.098 | 16.23%  |
|                         | R, G, g, GRRI, GBRI, MGRVI                                             | -278.64 | 0.765          | 0.102 | 16.81%  |
|                         | G, GRRI, GBRI                                                          | -278.86 | 0.743          | 0.106 | 17.59%  |

**Table S3.** Variable selection for SWR with combined texture feature in each growth stage.

| Growth Stages | Independent Variable                                                                                                                                                                                               | AIC     | R <sup>2</sup> | RMSE  | nRMSE/% |
|---------------|--------------------------------------------------------------------------------------------------------------------------------------------------------------------------------------------------------------------|---------|----------------|-------|---------|
| IF            | R, G, B, b, EXG, GBRI, RBRI, RGBVI, ExGR, CIVE, MEA_R, VAR_R, HOM_R, CON_R, DIS_R, MEA_G, VAR_G, HOM_G, CON_G, DIS_G, ASM_G, MEA_B, VAR_B, HOM_B, CON_B, DIS_B                                                     | -366.68 | 0.863          | 0.041 | 8.03%   |
|               | R, G, B, b, GBRI, RBRI, RGBVI, VAR_R, HOM_R, CON_R, DIS_R, MEA_G, VAR_G, ASM_G, VAR_B, HOM_B, CON_B, DIS_B                                                                                                         | -368.88 | 0.859          | 0.042 | 8.14%   |
|               | G, B, b, GBRI, RBRI, RGBVI, VAR_R, HOM_R, CON_R, DIS_R, MEA_G, VAR_G, ASM_G, VAR_B, HOM_B, CON_B, DIS_B                                                                                                            | -368.18 | 0.853          | 0.043 | 8.31%   |
| YF            | R, G, B, r, g, b, EXG, VARI, GRRI, GBRI, RGBVI, GLA, MGRVI, ExGR, CIVE, MEA_R, VAR_R, HOM_R, DIS_R, ENT_R, ASM_R, COR_R, MEA_G, VAR_G, HOM_G, DIS_G, ENT_G, COR_G, MEA_B, VAR_B, HOM_B, DIS_B, ENT_B, ASM_B, COR_B | -409.77 | 0.951          | 0.025 | 5.96%   |
|               | R, G, B, g, VARI, GRRI, GBRI, RGBVI, GLA, MGRVI, MEA_R, VAR_R, DIS_R, ENT_R, ASM_R, COR_R, VAR_G, HOM_G, DIS_G, ENT_G, COR_G, MEA_B, VAR_B, HOM_B, DIS_B, ENT_B, ASM_B                                             | -465.04 | 0.978          | 0.017 | 3.99%   |



|    |                                                                                                                                                                                                                    |         |       |       |       |
|----|--------------------------------------------------------------------------------------------------------------------------------------------------------------------------------------------------------------------|---------|-------|-------|-------|
| FE | R, G, B, g, VARI, GRRI, GBRI, RGBVI, GLA, MGRVI, MEA_R, VAR_R, DIS_R, ENT_R, ASM_R, COR_R, VAR_G, COR_G, MEA_B, VAR_B, HOM_B, DIS_B, ENT_B, ASM_B                                                                  | -445.41 | 0.967 | 0.021 | 4.88% |
|    | R, G, B, r, g, b, EXG, VARI, GRRI, GBRI, RGBVI, GLA, MGRVI, ExGR, CIVE, MEA_R, VAR_R, HOM_R, DIS_R, ENT_R, ASM_R, COR_R, MEA_G, VAR_G, HOM_G, DIS_G, ENT_G, COR_G, MEA_B, VAR_B, HOM_B, DIS_B, ENT_B, ASM_B, COR_B | -334.12 | 0.955 | 0.045 | 7.37% |
|    | R, B, r, g, VARI, GRRI, GBRI, RGBVI, GLA, MGRVI, VAR_R+ ENT_R, COR_R, MEA_G, HOM_G, ENT_G, COR_G, MEA_B, HOM_B, ENT_B, ASM_B                                                                                       | -343.92 | 0.947 | 0.048 | 7.99% |
|    | R, B, r, g, VARI, GRRI, GBRI, RGBVI, GLA, MGRVI, VAR_R, ENT_R, COR_R, MEA_G, COR_G, MEA_B, HOM_B, ENT_B, ASM_B                                                                                                     | -344.54 | 0.944 | 0.050 | 8.20% |
